# Supplementary material
Source: PubMed Central journal article supplement (PMC2661860)
Supplement: blood-2008-05-158642_1.pdf [file blood-2008-05-158642_1.pdf]

***Antibodies, Cell lines, viral stocks and plasmids.*** DCs were stained at day 7 using the following monoclonal antibodies (mAbs): CD4-peridinin chlorophyll protein (PerCP), HLA-DR-PerCP (BD); CD14-flourescein (FITC), CD83- phycoerythrin (PE), and CD86-FITC (Pharmingen); and DCSIGN-PE (R&D). Adequate differentiation from monocytes to iDCs was based on the loss of CD14 and the acquisition of DC-SIGN, while maturation upregulated the expression of CD83, CD86, and HLA-DR in DCs.

The human T cell lines Jurkat, MOLT and MT4 were grown in RPMI (Invitrogen). TZM-BL indicator cell line (obtained through the NIH AIDS Research and Reference Reagent Program, from Dr. Kappes) and HEK-293T cell line were maintained in D-MEM (Invitrogen). Ghost CXCR4/CCR5 (obtained through the NIH AIDS Research and Reference Reagent Program, from Dr. KwaiRamani and Dr. Littman) were maintained in D-MEM supplemented with 500 µg/ml of geneticin, 100 µg/ml of hygromycin and 1 µg/ml of puromycin (Invitrogen). All media contained 10% fetal bovine serum, 100 U/ml of penicillin and 10 µg/ml of streptomycin (all from Invitrogen).

VLP<sub>HIV-Gag-eGFP</sub> were obtained transfecting the molecular clone pGag-eGFP (obtained through the NIH AIDS Research and Reference Reagent Program, from Dr. Marilyn D. Resh<sup>1-4</sup>). The plasmid, pHIV-Gag-Cherry was constructed by substituting eGFP sequence for mCherry (derived from pmCherry-N1; Invitrogen) by swapping a BamHI-XbaI fragment. Replication competent full-length HIV<sub>NL43</sub>, HIV<sub>NFN-SX</sub> and HIV<sub>Lai</sub>, virus lacking the envelope glycoprotein HIV<sub>Δenv-Bru</sub> and HIV<sub>Δenv-NL43</sub> and the fluorescent HIV<sub>NL43/eGFP</sub> virus have been described elsewhere<sup>5,6</sup>. VLPs<sub>MLV-Gag</sub> were obtained

transfecting the molecular clone pCL-Eco (ImGenex) that expresses all of the ecotropic MLV structural genes. HEK-293T cells were transfected with calcium phosphate (CalPhos, BD) in T75 flasks using 20 µg of plasmid DNA. Viral stocks were also generated after HIV<sub>NL43</sub> infection of MOLT, MT4 or PHA-stimulated PBMCs. Supernatants containing virus and VLPs were filtered (Millex HV, 0.45 µm, Millipore) and frozen at -80°C until use. The p24<sup>Gag</sup> content of infectious viral stocks was determined by an ELISA (Perkin-Elmer). The p24<sup>gag</sup> content of VLP<sub>HIV-Gag-eGFP</sub> stocks was measured with a sandwich p24<sup>Gag</sup> ELISA using the anti-p24<sup>gag</sup> monoclonal antibody (183-H12-5C; AIDS Research and Reference Reagent Program) and HIV IG (cat # 3957; AIDS Research and Reference Reagent Program), as described previously<sup>7</sup>. HEK-293T cell derived VLP<sub>MLV-Gag</sub> containing supernatants were tested for presence of reverse transcriptase activity as described elsewhere<sup>8</sup>.

Indiana strain VSV was grown on BHK cells according to established protocols<sup>9</sup>. Briefly, cells at 70-80% confluence were infected with VSV (MOI = 0.01). Twenty-four h post-infection, media was removed and centrifuged at 2,000 x g for 5 min to remove cell debris. Virions were then pelleted by high-speed centrifugation for 1 h at 4°C (Sorvall Surespin rotor, 100,000 x g). Virus pellets were resuspended in 10mM Tris pH 8.1. Aliquots of virus were checked for purity by SDS-PAGE and coomassie staining for viral proteins. Portions of this enriched virus fraction were either treated with 400 µg/ml of pronase for 1 h at 4°C or mock-digested. The number of infectious viruses remaining in each sample was then determined by dilution and plaque assay on BHK cells<sup>10</sup>, and found to be reduced by >90% following proteases treatment. Pronase-treated VSV

particles were used in competitive binding assays with VLP<sub>HIV-Gag-eGFP</sub> as described in the materials and methods section.

**Carboxylated beads assays.** The yellow-green Carboxylated-Modified FluoSpheres® (Molecular Probes) of 0.1 µm of diameter were sonicated before each use, and the suspension was briefly centrifuged at high speed to further remove agglomerates. A total of  $5 \times 10^5$  iDCs and mDCs were incubated at 4°C and 37°C for 2 h with approximately  $1.8 \times 10^{10}$  beads at a final concentration of  $2 \times 10^6$  cells/ml. Pulsed DCs were washed with PBS and fixed with 2% formaldehyde to analyze by FACS. Forward-angle and side-scatter light gating were used to exclude dead cells and debris from all the analysis performed.

Carboxylated bead competition of HIV<sub>Δenv-NL43</sub> binding to mDCs was measured by pre-incubating  $5 \times 10^5$  mDCs for 30 min with increasing amounts of beads, and then pulsing the cells additionally for 1 h at 37°C with 130 ng of HIV<sub>Δenv-NL43</sub> p24<sup>Gag</sup> in a final volume of 0.5 ml. Cells were washed extensively with PBS, and each sample was divided in half: one-half of the sample was fixed and analyzed by flow cytometry for carboxylated bead capture. The other half was lysed with 0.5% Triton-X100 (at a final concentration of  $5 \times 10^5$  cells per ml), cleared of cell debris by centrifugation (10,000 x g for 5 min) and assayed for p24<sup>Gag</sup> antigen content by an ELISA.

**Co-localization analysis.** mDCs were pulsed for 12 h with 150 ng of HIV<sub>NL43</sub> p24<sup>gag</sup> and 3 mg of Exosomes<sub>DII</sub> per  $5 \times 10^5$  cells, extensively washed in PBS, and fixed in 2.5% glutaraldehyde for 1 h. Cells were then processed as described previously using a Jeol JEM 1010 electron microscope. Co-localization experiments were done pulsing mDCs with VLP<sub>HIV-Gag-eGFP</sub> and Exosomes<sub>DII</sub> during 6 h as described in the capture assays

section. Cells were then fixed and cytopun into glass-slides. Single sections were acquired with an Olympus FV1000 confocal microscope. Quantification of co-localization was performed using the FV10-ASW 1.7 software (Olympus), analyzing 35 vesicles in mDCs of 3 different donors. The co-localization signals in percentages of the vesicle's area and the Manders and Pearson coefficients were calculated for each image. To obtain three-dimensional reconstructions, confocal Z stacks were acquired for some vesicles and imported into the three-dimensional visualization software Imaris 6.1.0 (Bitplane AG), employing the isosurface module of Imaris.

***Kinetics experiments.*** Exosome kinetic analysis was assessed by pulsing  $2 \times 10^5$  mDCs with 150  $\mu\text{g}$  or 75  $\mu\text{g}$  of Exosomes<sub>Dil</sub> in a final volume of 0.1 ml. Cells were maintained at 37°C, and aliquots were periodically harvested over a period of 8 h before fixing them and analyzing exosome capture by FACS. VLP<sub>HIV-Gag-eGFP</sub> kinetic analysis was assessed in a similar way, pulsing cells with 2,500 pg of VLP<sub>HIV-Gag-eGFP</sub> p24<sup>Gag</sup> per  $1 \times 10^5$  cells at a final volume of 0.1 ml. Fate of captured VLP<sub>HIV-Gag-eGFP</sub> was assessed pulsing  $0.5 \times 10^6$  mDCs with 12,500 pg of p24<sup>Gag</sup> for 2 h. Cells were then extensively washed and kept in culture at 37°C for up to 48 h before fixing them and analyzing mDCs VLP retention capacity by FACS.

***Confirmation of pronase activity on exposed cells and particles.*** mDCs were stained with anti-DC-SIGN, anti-CD4 and anti-CD81 mAbs (BD). Mock treated or pronase-treated mDCs were challenged with 5 ng of His tagged soluble trimeric HIV-1 JFFL gp140 envelope glycoprotein (gracious gift of Dr. Joseph Sodroski, DFCI) for 1 h at 4°C, washed and gp140 binding to cells revealed by staining with serial incubations with biotin-conjugated anti-His mAb and straptavidin-FITC. Mean fluorescence intensity

values of staining were used to calculate the efficiency of protease treatment, which did not affect cell viability. To assess protease activity on particles, VLP<sub>HIV-Gag-eGFP</sub> pseudotyped with HIV-1 envelope glycoprotein gp120 were pelleted through 20% sucrose cushions (100,000 x g, 2 h, 4°C), resuspended in Dulbecco-PBS containing Ca<sup>2+</sup>, Mg<sup>2+</sup>, and were left untreated or treated with 400 µg/ml pronase for 1 h at 4°C. Pseudotyped VLPs were then diluted with DMEM media containing protease inhibitors (Roche), layered over a 50% Optiprep cushion (0.85% NaCl, 60 mM HEPES, pH 7.4) and centrifuged for 2 h at 100,000 x g. The VLPs present at the media-50% optiprep interface were harvested, pelleted and analyzed for expression of gp120 with a murine anti-gp120 monoclonal antibody (Clone 1121; Immunodiagnostics, Woburn, MA) and Gag-eGFP with mouse anti-HIV p24<sup>Gag</sup> mAb (Clone AG3.0, Cat#4121, NIH AIDS Research and Reference Reagent Program, Division of AIDS, NIAID, NIH) via western blot analysis. The efficiency of pronase activity on infectious virus particles (400 µg/ml of pronase for 1 h at 4°C) was confirmed by comparing the infectivity of untreated and pronase-treated wild type HIV<sub>NL43</sub> particles on TZM-BL cells. There was an 18-fold reduction in infectivity following pronase treatment (from a mean TCID<sub>50</sub>/ml of 22,357 to 1,167 after pronase treatment). Note that in these experiments the TZM-BL cells employed had the same final concentration of pronase, regardless of whether or not viral stocks had been previously treated with pronase.

***Confocal microscopy of pronase treated mDCs.*** Cells were left untreated or incubated with 200 µg/ml of pronase for 30 min at 4°C. Effectiveness of pronase treatment was confirmed as detailed above. Pronase or mock treated mDCs were exposed to VLP<sub>HIV-Gag-eGFP</sub>, HIV<sub>NL43-vpr-eGFP</sub> or Exosomes<sub>DII</sub> during 4 hours at 37°C in the presence of 50

$\mu\text{g/ml}$  of pronase to avoid complete recycling of the surface-exposed cellular receptors previously digested by the proteases. Cells were then washed and fixed or allowed to recover for 2 hours before starting a 4-hour co-culture with cell-tracker labeled Jurkat T cells. All samples were analyzed in a confocal microscope (Laser Optic Leica TCS SP2 AOBS).

*Amantadine and chlorpromazine treatment of mDCs.* Cells were treated with amantadine or chlorpromazine hydrochloride (Sigma) at the concentrations indicated for 30 min at  $37^{\circ}\text{C}$  before pulsing them with HIV<sub>NFN-SX</sub>. Pulsed mDCs were extensively washed and assayed for p24<sup>Gag</sup> with an ELISA. mDCs viability was assessed with FACS, labeling cells with propidium iodide and DIOC-6 (Sigma and MolecularProbes). Amantadine treated mDCs were also pulsed with VLP<sub>HIV-Gag-eGFP</sub>, stained with DAPI and TRITC, fixed with 2% of formaldehyde and cytopun into glass-slides to analyze them by deconvolution microscopy.

## REFERENCES

1. Hermida-Matsumoto L, Resh MD. Localization of human immunodeficiency virus type 1 Gag and Env at the plasma membrane by confocal imaging. *J Virol.* 2000;74:8670-8679.
2. Lindwasser OW, Resh MD. Myristoylation as a target for inhibiting HIV assembly: unsaturated fatty acids block viral budding. *Proc Natl Acad Sci U S A.* 2002;99:13037-13042.
3. Perlman M, Resh MD. Identification of an intracellular trafficking and assembly pathway for HIV-1 gag. *Traffic.* 2006;7:731-745.
4. Schwartz S, Campbell M, Nasioulas G, Harrison J, Felber BK, Pavlakis GN. Mutational inactivation of an inhibitory sequence in human immunodeficiency virus type 1 results in Rev-independent gag expression. *J Virol.* 1992;66:7176-7182.
5. Izquierdo-Useros N, Blanco J, Erkizia I, et al. Maturation of blood-derived dendritic cells enhances human immunodeficiency virus type 1 capture and transmission. *J Virol.* 2007;81:7559-7570.
6. Wiley RD, Gummuluru S. Immature dendritic cell-derived exosomes can mediate HIV-1 trans infection. *Proc Natl Acad Sci U S A.* 2006;103:738-743.
7. Wehrly K, Chesebro B. p24 antigen capture assay for quantification of human immunodeficiency virus using readily available inexpensive reagents. *Methods.* 1997;12:288-293.
8. Goff S, Traktman P, Baltimore D. Isolation and properties of Moloney murine leukemia virus mutants: use of a rapid assay for release of virion reverse transcriptase. *J Virol.* 1981;38:239-248.

9. Flood EA, Lyles DS. Assembly of nucleocapsids with cytosolic and membrane-derived matrix proteins of vesicular stomatitis virus. *Virology*. 1999;261:295-308.
10. Connor JH, McKenzie MO, Lyles DS. Role of residues 121 to 124 of vesicular stomatitis virus matrix protein in virus assembly and virus-host interaction. *J Virol*. 2006;80:3701-3711.
